# Supplementary material for: Two-Stage Categorization in Brand Extension Evaluation: Electrophysiological Time Course Evidence
Source: PLoS One. 2014 Dec 1;9(12):e114150. doi: 10.1371/journal.pone.0114150 (PMC4250186; doi:10.1371/journal.pone.0114150)
Supplement: Table S2 — The data of N400 in the experiment 1. It includes the mean amplitude in the time window of 300 ms to 450 ms for three categories (Beverage, Snack and Household appliance) at F3, Fz, F4, FC3, FCz, FC4, C3, Cz, C4, CP3, CPz, CP4, P3, Pz and P4 electrodes. (XLSX) [file pone.0114150.s002.xlsx]

## Sheet: Sheet1
Categories	Beverage Category															Snack Category															Household appliance Category
electrode	F3	Fz	F4	FC3	FCz	FC4	C3	Cz	C4	CP3	CPz	CP4	P3	Pz	P4	F3	Fz	F4	FC3	FCz	FC4	C3	Cz	C4	CP3	CPz	CP4	P3	Pz	P4	F3	Fz	F4	FC3	FCz	FC4	C3	Cz	C4	CP3	CPz	CP4	P3	Pz	P4
Subject-1	-3.25976	-3.30968	-3.08111	-3.25177	-4.04738	-2.99892	-1.86693	-2.56758	1.1562	0.800263	0.805334	1.5537	0.815734	0.879304	1.68056	-4.59553	-4.66662	-4.5282	-4.54466	-6.28425	-4.48271	-3.99574	-5.77151	-0.821264	-0.627395	-0.770773	-0.49201	-0.570688	-0.764847	-0.396079	-4.21165	-4.27729	-4.075	-4.22372	-6.26238	-4.02289	-2.42369	-5.70048	-0.825788	-0.713635	-0.942831	-0.512502	-0.60952	-0.914584	-0.347576
Subject-2	-2.79879	-1.4654	-0.96956	-1.20737	-0.667041	-1.07451	-0.40396	-0.169188	0.009297	0.918896	0.276987	0.996391	0.97248	0.931806	1.09568	-3.58861	-4.35124	-4.37976	-3.23611	-4.2626	-3.74027	-2.44724	-3.77454	-2.75769	-2.38101	-2.60611	-2.01133	-1.71299	-1.77761	-1.45434	-2.64846	-3.01491	-2.58378	-1.86252	-3.1732	-2.75532	-0.799231	-3.11908	-2.57103	-1.41442	-2.30411	-1.6648	-1.77452	-1.80987	-1.51737
Subject-3	-1.78329	-0.856071	-0.981148	-2.93233	-2.32847	-1.5373	-2.30002	-3.81775	-1.99222	-2.0707	-4.55516	-2.11925	-0.392566	-5.06974	-0.809086	-1.87192	-2.10867	-1.83819	-2.63024	-2.55215	-2.25144	-2.06894	-3.03861	-2.28546	-1.60071	-3.04246	-1.03689	0.253693	-2.86232	0.034908	-1.2704	-2.02765	-3.41065	-2.58664	-4.19082	-4.51591	-2.24112	-5.8056	-4.65034	-3.10968	-7.04794	-4.44482	-1.58888	-7.81491	-2.72811
Subject-4	0.128833	-0.172515	-0.026613	0.844036	1.96849	1.71337	2.15499	2.41077	3.46241	1.91988	2.74219	3.80614	1.84504	2.68952	3.86977	-4.29341	-4.96509	-4.93608	-2.35181	-3.59533	-2.48687	-1.49198	-2.01359	-0.670854	0.114295	-0.041675	1.11018	0.127521	0.311044	1.71555	-3.31646	-3.22436	-3.65063	-3.34401	-3.78567	-2.59046	-1.88308	-2.7197	-1.16208	-0.954132	-2.08598	-0.026621	-0.995366	-0.415344	0.5293
Subject-5	-0.104362	0.07273	-0.458241	-0.462621	-1.48209	-1.7662	-1.19169	-3.28068	-2.58413	-2.53416	-2.92703	-1.25912	0.369278	-2.73216	-1.231	-2.17157	-2.76977	-3.78662	-2.32555	-3.08087	-3.58858	-1.5963	-3.45638	-2.76675	-1.01033	-1.53796	-1.67903	0.075647	-1.44517	-1.79058	-1.5792	-2.06379	-2.79569	-1.50551	-2.39934	-2.98789	-1.56064	-3.44549	-2.1342	-2.30416	-3.0042	-1.34715	0.090203	-2.91753	-1.39722
Subject-6	-0.33739	-2.3024	-2.70531	-1.78186	-2.79563	-2.48482	-2.14018	-3.31563	-3.0249	-2.12939	-3.31526	-3.28856	-1.57963	-3.04522	-3.13031	-2.01362	-1.41795	-1.83342	-1.82768	-2.17116	-1.71988	-0.707369	-1.7402	-1.29655	-0.04157	-1.88131	-1.07443	-0.827842	-2.21883	-0.962898	0.985246	0.763116	1.12043	0.033014	-0.76803	-0.224637	-0.545977	-1.51303	-0.57815	-0.824879	-2.11565	-0.598127	-1.33565	-2.67554	-1.06848
Subject-7	-3.94224	-5.61021	-4.22874	-4.39181	-4.06746	-3.35783	-3.68429	-3.59976	-2.26861	-0.946097	-1.73458	-0.313165	0.034984	-1.52952	0.27297	-3.41341	-2.84073	-3.671	-3.18165	-3.98235	-2.75693	-3.65232	-4.3163	-3.17361	-3.30668	-4.23233	-3.44977	-0.699284	-2.08093	-2.78159	-5.08513	-5.45863	-4.26587	-3.8466	-4.79538	-4.85142	-3.33738	-5.0187	-4.64106	-3.36699	-4.02516	-3.32312	-1.30415	-2.55209	-2.8764
Subject-8	1.64916	3.02984	3.8751	1.74858	2.10931	3.05322	0.513914	-0.03631	-1.1416	-0.198569	-0.411347	0.207077	0.471984	-2.14719	0.309735	-1.46224	0.027557	1.90583	-0.529474	0.076723	-0.75454	-1.63464	-1.30547	1.64698	-1.15857	-1.41053	-0.275425	1.22747	-0.468169	0.495033	-0.80858	0.023961	0.336481	-1.31541	-0.356971	0.507294	-2.21912	-1.83444	-2.6552	-2.13181	-1.86615	-0.947963	-0.440008	-1.6984	1.01825
Subject-9	-3.6891	-5.01408	-3.53103	-3.99885	-4.96633	-3.29019	-2.82473	-4.82318	-2.06305	-1.75952	-4.78958	-0.520182	-1.74157	-1.73354	-0.483834	-2.28152	-2.49381	-1.65574	-2.74632	-3.4899	-1.27628	-1.41261	-3.35627	-0.514819	-0.701802	-3.35212	0.466586	-0.689523	-0.71184	0.473114	-2.94292	-3.5906	-3.03708	-3.65573	-4.87724	-2.79449	-2.04291	-4.55193	-1.91101	-1.02839	-4.55776	-1.84138	-1.07368	-1.12319	-1.83507
Subject-10	-2.27834	-1.30339	-1.42349	0.121557	-0.368073	-0.213317	1.89068	1.93043	1.68911	3.47534	1.97954	3.01808	2.79139	3.58268	4.57914	-3.44546	-3.20049	-2.34172	-1.76451	-2.11698	-2.07788	-0.119481	0.058054	-0.961864	2.05469	0.128772	0.79346	2.39151	2.3797	3.50558	-2.69983	-3.38509	-2.96963	-2.70208	-3.37159	-2.48649	-0.794236	-2.25541	-2.08387	0.769229	-2.20852	-0.628059	1.7508	0.357139	1.72095
Subject-11	-4.27547	-4.60101	-4.43611	-4.01115	-4.21622	-2.4908	-2.30507	-2.00553	-1.23947	1.10848	-1.98109	1.513	1.85488	1.74636	1.64261	-5.11654	-4.66013	-3.66455	-4.85999	-4.20924	-2.44375	-3.53733	-3.24778	-1.61481	-1.42017	-3.18887	-0.995908	-0.998004	-1.0069	-0.983682	-2.56065	-4.36513	-2.48769	-2.48714	-4.57188	-1.84041	-1.74364	-2.74507	-1.7237	-0.555776	-2.74673	0.015629	-0.031474	-0.062255	0.07016
Subject-12	-2.20894	-2.39504	-2.40015	-2.20765	-1.86804	-1.59245	-2.17078	-1.06159	-0.963259	0.539456	-1.06917	-0.898645	0.59573	0.101753	-0.317627	-1.02021	-0.349	-0.260458	-1.02236	0.050402	0.958784	-1.00251	0.019175	1.17588	1.37362	0.012243	0.511295	0.987855	0.370744	0.011213	-0.229333	-0.642708	-0.641861	-0.204195	0.165362	-0.022382	-0.135359	0.215371	0.259258	-0.009964	0.204771	0.004889	0.883301	0.027018	-0.794164
Subject-13	-2.56577	-2.53186	-3.50466	-2.39355	-2.7265	-1.4127	0.236629	-1.40916	-0.418042	3.4813	1.93274	1.86356	4.59368	3.895	6.40474	-6.0284	-9.32946	-7.46558	-6.03142	-7.81447	-8.73216	-6.01427	-6.88499	-7.00494	-3.60119	-5.46884	-4.98792	-1.38992	-2.8107	-0.596538	-1.92355	-3.50301	-3.98276	-1.95521	-2.56138	-4.05054	-0.180373	-1.98486	-2.19756	1.59764	1.27329	-0.305447	2.24948	0.303881	1.79195
Subject-14	-0.757768	0.248517	-1.01878	-1.75977	-1.49273	-1.07276	-1.21389	-2.12509	-1.07765	2.59957	-1.60703	0.576566	3.30086	-2.00785	-2.03209	-1.92932	-1.52235	-0.829197	-1.79493	-1.13992	-1.64657	-2.37087	-1.96031	-1.66801	0.853523	-3.80062	-0.741557	1.38544	-4.82358	-4.27479	-1.4745	-0.625616	-0.080459	-1.41369	0.199137	0.727355	-1.70241	-1.51743	0.754562	1.37146	-1.94109	0.430557	1.71086	-3.0783	-1.55949
Subject-15	1.38249	1.22953	1.30947	1.17948	1.02435	1.28527	1.79721	0.785033	1.61042	1.15412	0.700466	1.93598	2.21598	1.42661	3.04213	-1.37884	-1.46774	-2.68869	-1.30913	-1.36892	-1.67684	-0.384171	-0.92649	-0.721773	1.53401	0.454961	0.019599	-0.789518	-0.345543	1.27222	0.272458	1.27282	0.937648	0.202642	1.0139	0.397942	0.934092	0.968447	1.18025	1.24765	0.391401	1.76202	2.30531	1.88902	1.59714
Subject-16	1.98443	2.59652	2.61498	1.72504	3.32708	2.99976	1.48848	2.39499	2.94783	1.32206	0.75109	1.47209	0.982085	0.702963	1.54856	1.03708	1.1544	0.950908	0.688739	1.17533	0.672263	0.519292	0.911627	0.733337	0.34704	0.365345	1.03725	0.032317	0.35037	0.990403	0.348987	0.678371	0.993457	0.125457	0.650925	0.650398	-0.151476	-1.20124	0.432069	-0.343602	-1.29455	-0.348271	-0.64935	-1.30947	-0.412602
Subject-17	-3.18994	-2.82785	-2.49191	-3.74157	-2.85886	-2.07219	-1.97109	-2.71311	-2.09865	-2.67757	-2.163	-1.43223	-0.289679	-1.64989	-1.0515	-5.16467	-5.18976	-5.39959	-4.91969	-5.18199	-4.35503	-4.24917	-4.47806	-4.61603	-3.21897	-4.24782	-4.13209	-2.09414	-2.96239	-2.91988	-7.0351	-6.48428	-6.32134	-5.8868	-6.54497	-4.77841	-5.18185	-6.22511	-5.4001	-3.93926	-6.55993	-4.1187	-2.74988	-4.48413	-3.31851
